# Supplementary material for: A new multicomponent heterogeneous ice nucleation model and its application to Snomax bacterial particles and a Snomax–illite mineral particle mixture
Source: Copernicus journal article supplement (doi:10.5194/acp-17-13545-2017), 2017-11-15
Supplement: Supplementary file 1 [file acp-17-13545-2017-supplement.zip]

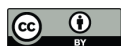

## *Supplement of*

# **A new multicomponent heterogeneous ice nucleation model and its application to Snomax bacterial particles and a Snomax–illite mineral particle mixture**

**Hassan Beydoun et al.**

*Correspondence to:* Ryan C. Sullivan (rsullivan@cmu.edu)

- acp-17-13545-2017-supplement-title-page.pdf
- Data\_paper
  - Illite\_Frozen\_fraction.mat
  - Mixing\_dataset.mat
  - Paper\_code.rtf
  - README.rtf
  - Snomax\_dataset\_all\_concentrations.mat
- \_\_MACOSX
  - .\_Data\_paper
  - Data\_paper
    - \* .\_Illite\_Frozen\_fraction.mat
    - \* .\_Mixing\_dataset.mat
    - \* .\_Paper\_code.rtf
    - \* .\_README.rtf
    - \* .\_Snomax\_dataset\_all\_concentrations.mat

The copyright of individual parts of the supplement might differ from the CC BY 3.0 License.
